# Supplementary material
Source: publisher site journal article supplement (http://kjim.org/upload/media/kjim-2019-428-suppl1.pdf)
Supplement: Supplementary file 1 [file kjim-2019-428-suppl1.pdf]

**Supplementary Table 1. Disease codes used for patient selection and outcome evaluation**

| Terms in article         | ICD-10th code | Diagnosis                                                                                   |
|--------------------------|---------------|---------------------------------------------------------------------------------------------|
| Type 2 diabetes mellitus | E11           | Type 2 diabetes mellitus                                                                    |
|                          | E12           | Malnutrition-related diabetes mellitus                                                      |
|                          | E13           | Other specified diabetes mellitus                                                           |
|                          | E14           | Unspecified diabetes mellitus                                                               |
| Cardiovascular disease   | I20           | Angina pectoris                                                                             |
|                          | I21           | Acute myocardial infarction                                                                 |
|                          | I22           | Subsequent myocardial infarction                                                            |
|                          | I23           | Certain current complications following acute myocardial infarction                         |
|                          | I24           | Other acute ischaemic heart diseases                                                        |
|                          | I25           | Chronic ischaemic heart disease                                                             |
| Cerebrovascular disease  | I60           | Subarachnoid haemorrhage                                                                    |
|                          | I61           | Intracerebral haemorrhage                                                                   |
|                          | I62           | Other nontraumatic intracranial haemorrhage                                                 |
|                          | I63           | Cerebral infarction                                                                         |
|                          | I64           | Stroke, not specified as haemorrhage or infarction                                          |
|                          | I65           | Occlusion and stenosis of precerebral arteries, not resulting in cerebral infarction        |
|                          | I66           | Occlusion and stenosis of cerebral arteries, not resulting in cerebral infarction           |
| Oral cancer              | C00-14        | Malignant neoplasms of lip, oral cavity and pharynx                                         |
| Esophagus cancer         | C15           | Malignant neoplasm of oesophagus                                                            |
| Stomach cancer           | C16           | Malignant neoplasm of stomach                                                               |
| Colorectal cancer        | C18           | Malignant neoplasm of colon                                                                 |
|                          | C19           | Malignant neoplasm of rectosigmoid junction                                                 |
|                          | C20           | Malignant neoplasm of rectum                                                                |
| Liver cancer             | C22           | Malignant neoplasm of liver and intrahepatic bile ducts                                     |
| Biliary tract cancer     | C23           | Malignant neoplasm of gallbladder                                                           |
|                          | C24           | Malignant neoplasm of other and unspecified parts of biliary tract                          |
| Pancreatic cancer        | C25           | Malignant neoplasm of pancreas                                                              |
| Larynx cancer            | C32           | Malignant neoplasm of larynx                                                                |
|                          | C33           | Malignant neoplasm of trachea                                                               |
| Lung cancer              | C34           | Malignant neoplasm of bronchus and lung                                                     |
| Breast cancer            | C50           | Malignant neoplasm of breast                                                                |
| Ovary cancer             | C56           | Malignant neoplasm of ovary                                                                 |
| Prostate cancer          | C61           | Malignant neoplasm of prostate                                                              |
| Kidney cancer            | C64           | Malignant neoplasm of kidney, except renal pelvis                                           |
| Bladder cancer           | C67           | Malignant neoplasm of bladder                                                               |
| Brain and CNS cancer     | C70           | Malignant neoplasm of meninges                                                              |
|                          | C71           | Malignant neoplasm of brain                                                                 |
|                          | C72           | Malignant neoplasm of spinal cord, cranial nerves and other parts of central nervous system |
| Thyroid cancer           | C73           | Malignant neoplasm of thyroid gland                                                         |
| Hodgkin lymphoma         | C81           | Hodgkin lymphoma                                                                            |

**Supplementary Table 1. Continued**

| Terms in article     | ICD-10th code | Diagnosis                                                                                |
|----------------------|---------------|------------------------------------------------------------------------------------------|
| Non-Hodgkin lymphoma | C82           | Follicular lymphoma                                                                      |
|                      | C83           | Non-follicular lymphoma                                                                  |
|                      | C84           | Mature T/NK-cell lymphomas                                                               |
|                      | C85           | Other and unspecified types of non-Hodgkin lymphoma                                      |
|                      | C96           | Other and unspecified malignant neoplasms of lymphoid, haematopoietic and related tissue |
| Leukaemia            | C91           | Lymphoid leukaemia                                                                       |
|                      | C92           | Myeloid leukaemia                                                                        |
|                      | C93           | Monocytic leukaemia                                                                      |
|                      | C94           | Other leukaemias of specified cell type                                                  |
|                      | C95           | Leukaemia of unspecified cell type                                                       |

ICD-10, International Classification of Diseases, 10th Revision; CNS, cerebral nervous system; NK, natural killer.
